# Supplementary material
Source: HighWire-hosted journal article supplement (https://adc.bmj.com/content/105/1/32)

## Supplementary file 1

Figure. Study and data collection periods

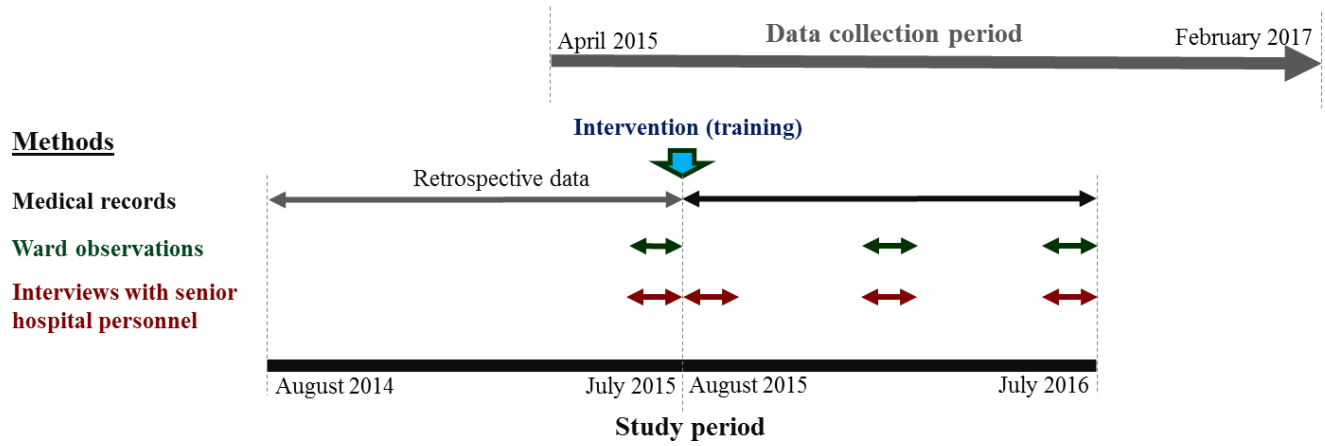

Supplement: inline-supplementary-material-1 [file inline-supplementary-material-1.pdf]
