# Supplementary material
Source: HighWire-hosted journal article supplement (https://adc.bmj.com/content/105/1/32)
Supplement: inline-supplementary-material-3 [file inline-supplementary-material-3.pdf]

### Supplementary file 3

**Table.** Case-fatality rates for SAM for the 12 months preintervention and 12 months postintervention (<6 month, 6-60 month and overall)

| Case-fatality rate | Pre-intervention [A] | Post-intervention [B] | Difference [B – A] in % (95% CI) | <i>P</i> value      |
|--------------------|----------------------|-----------------------|----------------------------------|---------------------|
| <6m                | 7/65 (10.8%)         | 3/83 (3.6%)           | -7.2 (-17.3, 1.3)                | 0.106 <sup>3</sup>  |
| 6–60m <sup>1</sup> | 19/384 (4.9%)        | 11/662 (1.7%)         | -3.3 (-6.0, -1.1)                | 0.002 <sup>2</sup>  |
| Overall            | 26/449 (5.8%)        | 14/745 (1.9%)         | -3.9 (-6.6, -1.7)                | <0.001 <sup>2</sup> |

<sup>1</sup> Includes matched, unclassifiable and missed SAM.

<sup>2</sup> X<sup>2</sup> test was performed.

<sup>3</sup> Fisher's exact test was performed.

SAM, severe acute malnutrition
